# Supplementary material for: High potency multistrain probiotic improves liver histology in non-alcoholic fatty liver disease (NAFLD): a randomised, double-blind, proof of concept study
Source: PubMed Central journal article supplement — BMJ Open Gastroenterol. 2019 Aug 7;6(1):e000315. doi: 10.1136/bmjgast-2019-000315 (PMC6688701; doi:10.1136/bmjgast-2019-000315), 2019-08-07
Supplement: bmjgast-2019-000315supp001.pdf [file bmjgast-2019-000315supp001.pdf]

**Table 1a** Distribution of patients with metabolic syndrome at baseline, 3 mon and 12 mon

| Arms      | 0 Mo |    | P value* | 3 Mo |    | P value* | 12 Mo |    | P value* |
|-----------|------|----|----------|------|----|----------|-------|----|----------|
|           | Yes  | No |          | Yes  | No |          | Yes   | No |          |
| Probiotic | 7    | 9  | 0.495    | 6    | 9  | 0.153    | 2     | 11 | 0.049    |
| Placebo   | 6    | 12 |          | 7    | 9  |          | 6     | 7  |          |

\* Pearson chi-square test

mo, months;

**Table 1b** Distribution of patients with number of abnormalities in components of metabolic syndrome at baseline, 3 mon and 12 mon

| Arms / Time/<br>No. of<br>abnormalities | Probiotic |        |        | Placebo |        |        |
|-----------------------------------------|-----------|--------|--------|---------|--------|--------|
|                                         | 0 mo      | 3 mo   | 12 mo  | 0 mo    | 3 mo   | 12 mo  |
| 0                                       | 1         | 1      | 1      | 4       | 2      | 0      |
| 1                                       | 2         | 4      | 5      | 1       | 3      | 3      |
| 2                                       | 6         | 4      | 5      | 7       | 4      | 4      |
| 3                                       | 6         | 6      | 2      | 4       | 6      | 3      |
| 4                                       | 1         | 0      | 0      | 1       | 0      | 3      |
| 5                                       | 0         | 0      | 0      | 1       | 1      | 0      |
| P-value                                 |           | 0.039* | 0.437^ |         | 0.124* | 0.054^ |

\* Comparison within group, 0 mo vs 3 mo

^ Comparison within group, 0 mo vs 12 mo

mo, months; Between group analysis for metabolic abnormalities: P-value at 0 mon = 0.175; P-value at 3 mon = 0.569; P-value at 12 mon = 0.094
