# Supplementary figures and images for: High potency multistrain probiotic improves liver histology in non-alcoholic fatty liver disease (NAFLD): a randomised, double-blind, proof of concept study
Source: PubMed Central journal article supplement — BMJ Open Gastroenterol. 2019 Aug 7;6(1):e000315. doi: 10.1136/bmjgast-2019-000315 (PMC6688701; doi:10.1136/bmjgast-2019-000315), 2019-08-07

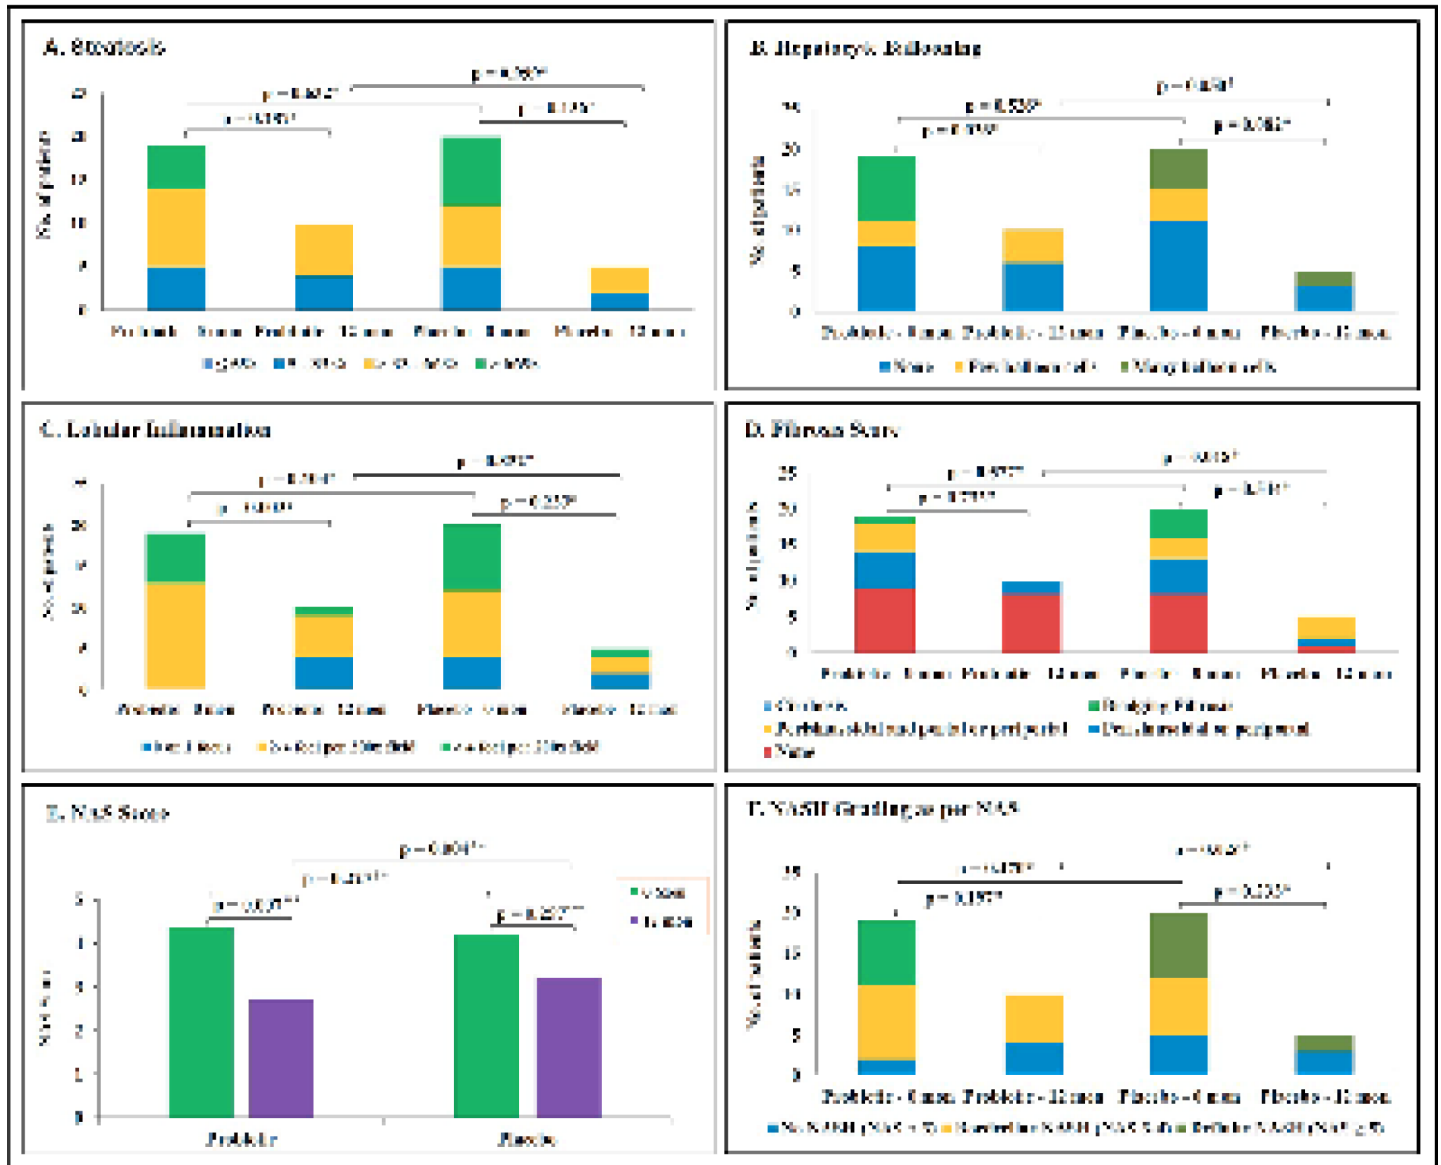

Supplement: bmjgast-2019-000315supp002.pdf [file bmjgast-2019-000315supp002.pdf]
